# Supplementary material
Source: PubMed Central journal article supplement (PMC5700365)
Supplement: AAC.01586-17_zac012176702s1.pdf [file AAC.01586-17_zac012176702s1.pdf]

**A**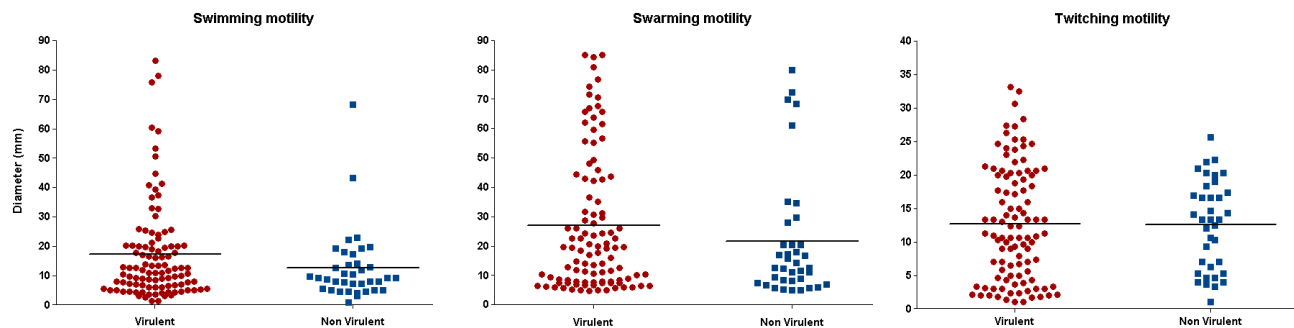**B**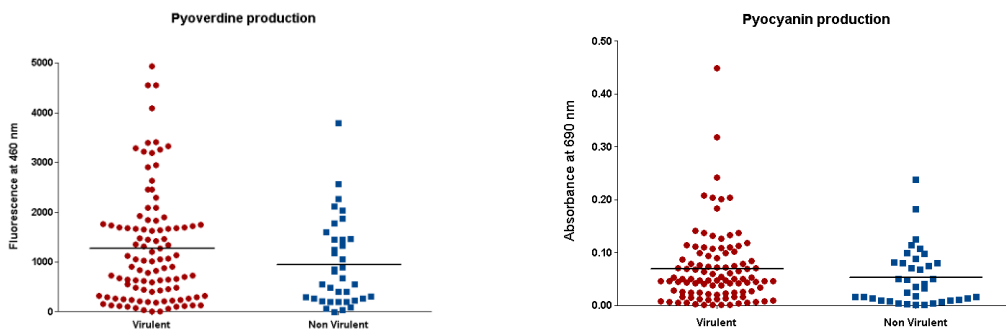

**Figure S1.** Comparative analyses of swimming, swarming and twitching motility assays (A) and pyoverdine and pyocyanin production assays (B) in virulent (CEVS 3-5) versus non-virulent (CEVS 1-2) isolates in the *C. elegans* model.

2D Plot of Row and Column Coordinates; Dimension: 1 x 2  
Input Table (Rows x Columns): 140 x 23  
Standardization: Row and column profiles

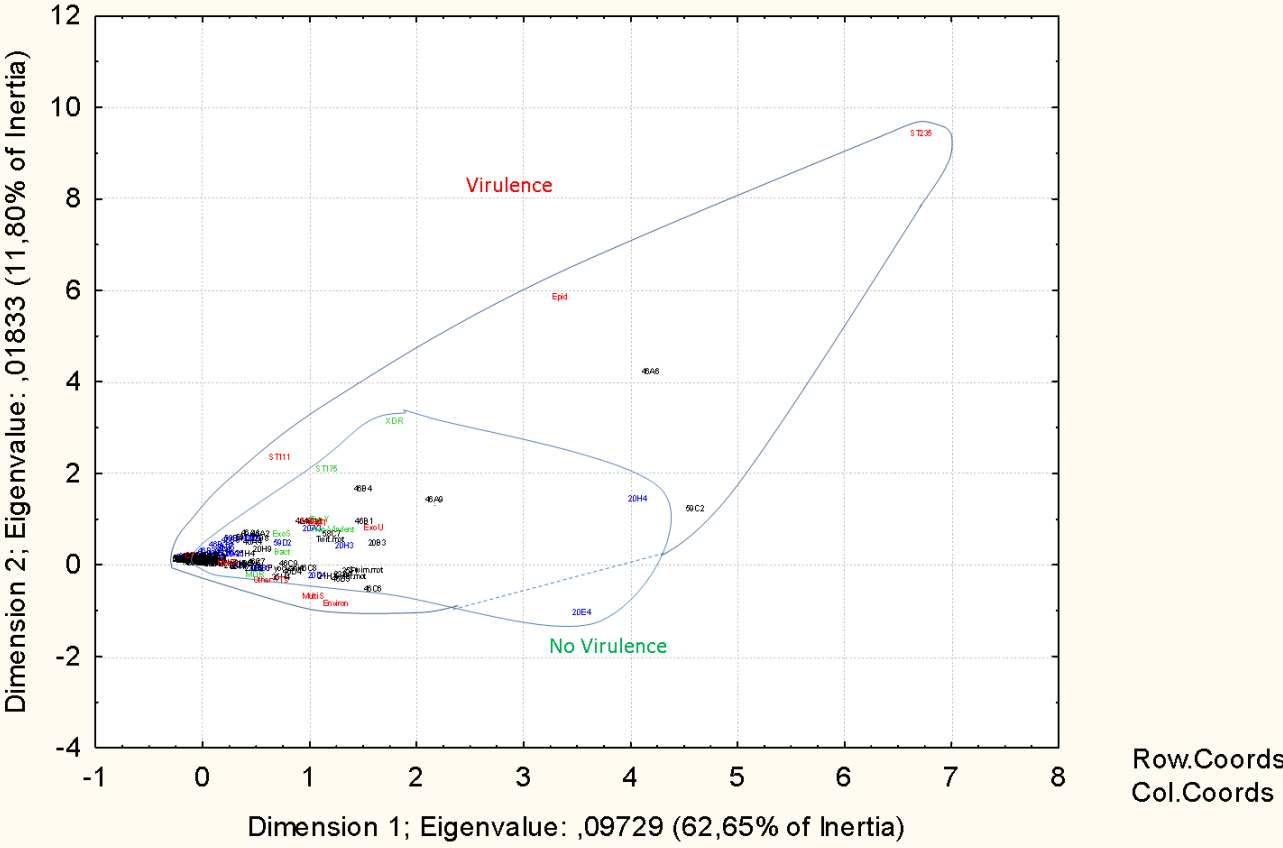

Row.Coords  
Col.Coords

2D Plot of Row and Column Coordinates; Dimension: 1 x 3  
Input Table (Rows x Columns): 140 x 23  
Standardization: Row and column profiles

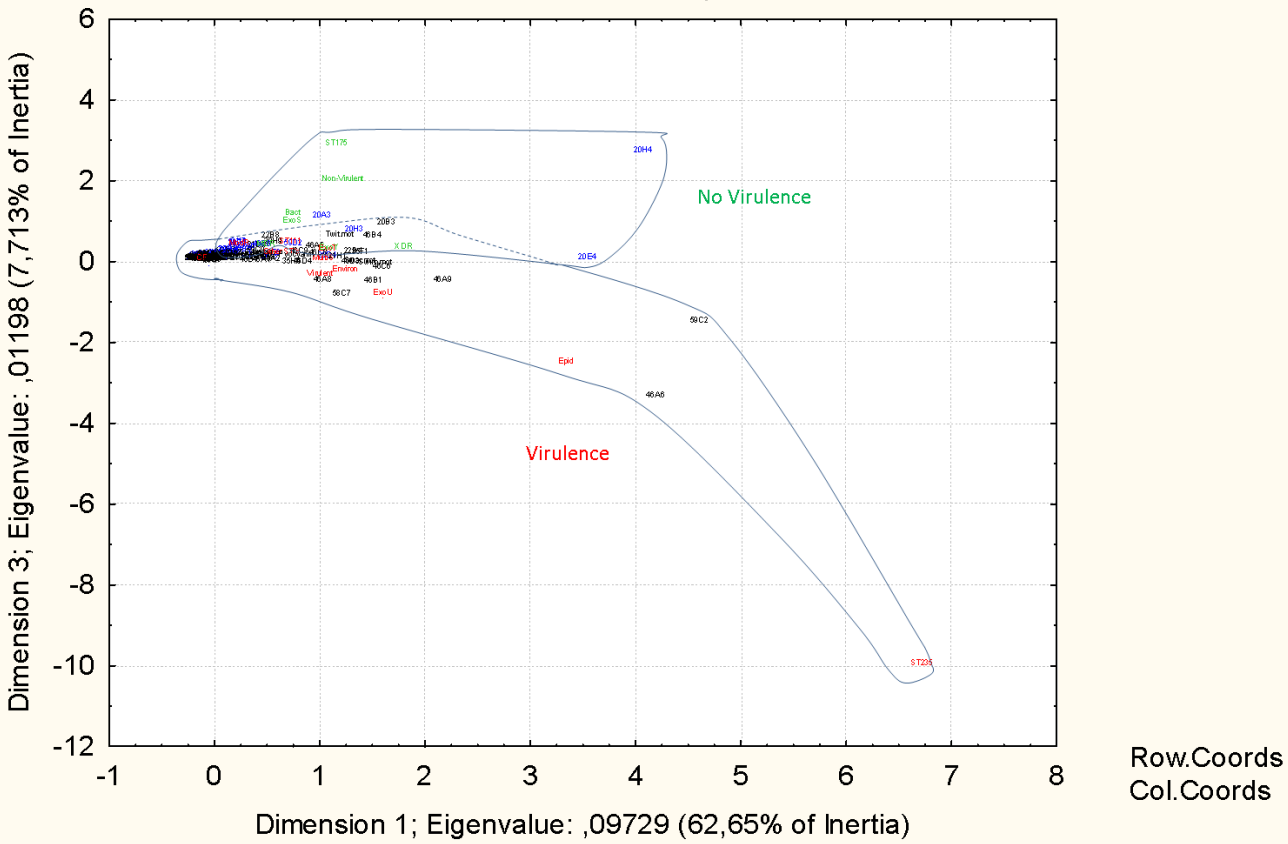

2D Plot of Row and Column Coordinates; Dimension: 2 x 3  
Input Table (Rows x Columns): 140 x 23  
Standardization: Row and column profiles

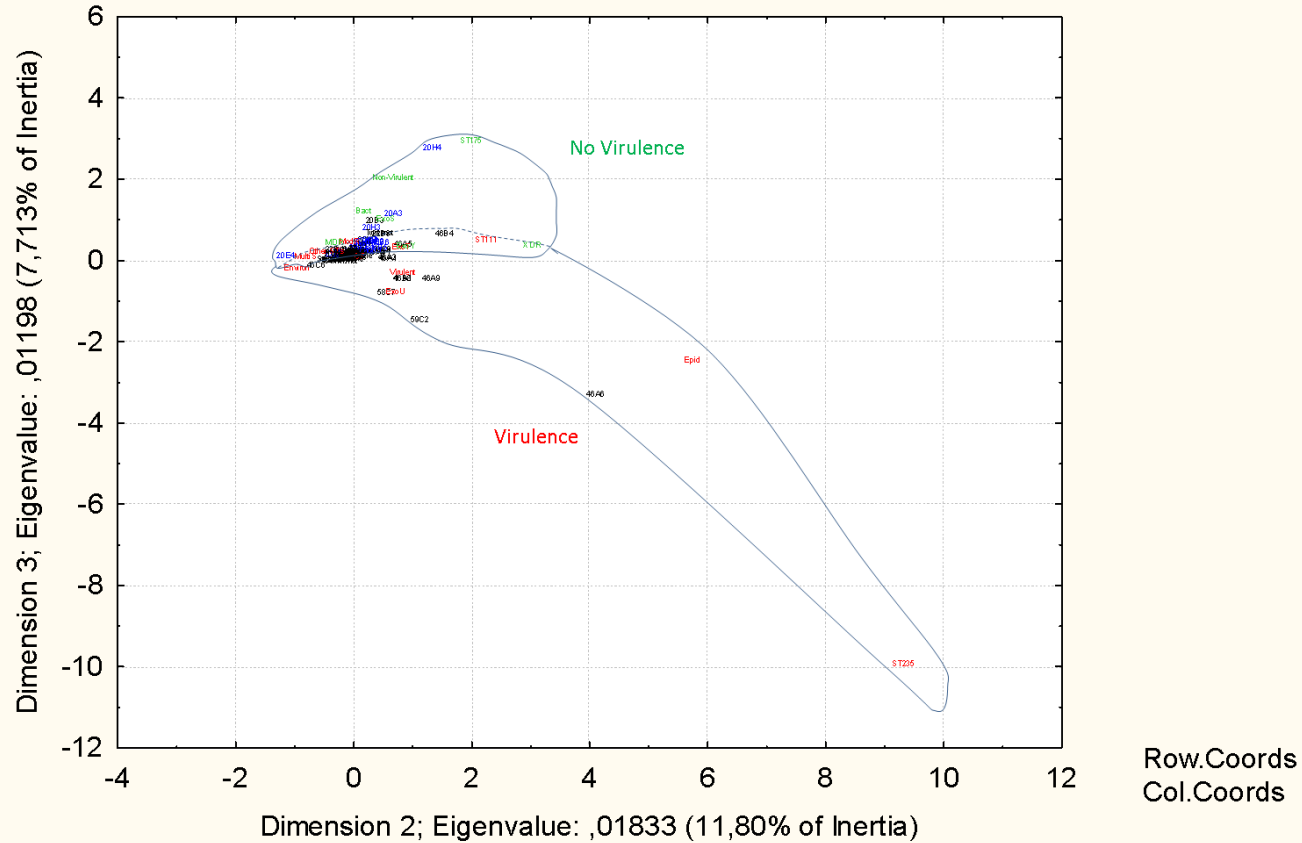

**Figure S2.** Disposition of clones and variables in the Factorial Space according to the Correspondence Analysis. The three first axis explain the 82.16% of total variation or inertia. Over the general background it is possible to infer the virulent and non-virulent structure based in those inferred by Factorial Analysis (Fig. 4).

|                                  | <b>Factor 1</b>  | <b>Factor 2</b>  | <b>Factor 3</b>  |
|----------------------------------|------------------|------------------|------------------|
| <b>Other ST's</b>                | 0,473078         | <b>0,755805</b>  | 0,162859         |
| <b>ST111</b>                     | 0,143600         | -0,354937        | -0,219576        |
| <b>ST175</b>                     | <b>-0,729383</b> | -0,331501        | -0,191779        |
| <b>ST235</b>                     | 0,153441         | <b>-0,574049</b> | 0,286685         |
| Bacteremia ( <b>Bact</b> )       | <b>-0,647794</b> | 0,481196         | -0,055631        |
| Epidemic ( <b>Epid</b> )         | 0,050234         | <b>-0,825243</b> | 0,077954         |
| Cystic Fibrosis ( <b>CF</b> )    | <b>0,523223</b>  | 0,068951         | <b>-0,564354</b> |
| Environmental ( <b>Environ</b> ) | 0,342661         | 0,075778         | <b>0,565074</b>  |
| <b>XDR</b>                       | -0,216590        | <b>-0,793884</b> | -0,225944        |
| <b>ModR</b>                      | -0,016688        | 0,386670         | 0,062613         |
| <b>MultiS</b>                    | 0,206159         | 0,325017         | <b>0,595526</b>  |
| <b>MDR</b>                       | 0,046874         | 0,222460         | -0,457609        |
| <b>ExoU</b>                      | 0,238108         | -0,038874        | <b>0,671287</b>  |
| <b>ExoS</b>                      | -0,283166        | 0,122514         | <b>-0,671469</b> |
| <b>ExoT</b>                      | -0,207426        | 0,032910         | 0,186442         |
| <b>ExoY</b>                      | -0,270468        | -0,067312        | -0,132127        |
| <b>Non-Virulent</b>              | <b>-0,796247</b> | -0,041577        | -0,141304        |
| <b>Virulent</b>                  | <b>0,796247</b>  | 0,041577         | 0,141304         |
| Twitching motility (Twit.mot)    | -0,317305        | 0,326095         | 0,458140         |
| Swimming motility (Swim.mot)     | 0,119745         | 0,263959         | <b>0,626552</b>  |
| Swarming motility (Swar.mot)     | -0,023952        | <b>0,506912</b>  | 0,480658         |
| Pyoverdine                       | 0,070486         | <b>0,528306</b>  | -0,037006        |
| Pyocyanin                        | 0,252977         | 0,494242         | 0,012694         |

**Table S1.** Factor Analysis for studied variables. The numbers represent the factor loadings (relative explanation) of the variables according the three main factors which were extracted by Principal components approach. Factor Loadings were Varimax normalized (Marked loadings are  $>,50$ ). Most of variables are also well represented in the factorial space which link strains and variables (Fig. S2). Variables negatively or positively associated with virulence are shown in green or red color, respectively. Red data indicates the most important factors.
